# Supplementary material for: Effects of Earth's magnetic field variation on high frequency wave propagation in the ionosphere
Source: Copernicus journal article supplement (doi:10.5194/angeo-2019-27), 2019-02-27
Supplement: Supplementary file [file angeo-2019-27-AC1-supplement.pdf]

## **Answer to Reviewer #1:**

Thank you very much for your comments and corrections.

Following are our answer (in black) to each of your comments (in red).

### **General comment**

The manuscript describes influence of substantial changes of the Earth's magnetic field that might take place in future on propagation of high frequency (HF) radio waves in the ionosphere. The propagation and downward refraction of the radio waves in the ionosphere is studied by 3D ray tracing code. The authors mainly focus on the changes of ground range R for the waves transmitted at specific frequency and elevation angle, and partly also on the changes of the so-called Spitze angle.

The main problem of the presented study is that it does not take into account any variability of electron densities in the ionosphere, which has a major effect on HF wave propagation and hence on the ground range R, whereas the changes in magnetic field have only minor effect. The authors themselves found that changes in R owing to relatively drastic variations of the Earth's magnetic field (dipole collapse or reversal) are by at most 2% for globally constant electron distribution. I expect that such R changes are much lower than R changes owing to diurnal and seasonal variability of the ionosphere and also much lower than uncertainties in the calculated R owing to uncertainties in ionospheric model, ionospheric disturbances etc. I miss any comparison with these ionospheric variations and uncertainties. Moreover, it is reasonable to expect that such dramatic future changes of the Earth's magnetic field will be associated with global changes of electron densities as the authors also partly mention in the Introduction. Therefore, I consider the presented study a sophisticated workout on ray tracing code rather than a useful geophysical investigation.

The main idea of this work is to isolate the field effect. Indeed natural electron density variations (daily, seasonal, decadal due to solar activity, etc.) have a stronger effect on R than the natural variation of the Earth's magnetic field, even during reversal scenarios – we will add to the text a thorough comparison between the effects of electron density and magnetic field morphology on the ground range. However, the effect of the magnetic field is important for two main reasons:

1. from a theoretical point of view.
2. electron density is characterized by large amplitude high frequency variations (days, annual, decadal), whereas the magnetic field is characterized by low amplitude lower frequency variations. Our study reveals the ground range variability over a timescale of several thousand years of a reversal.

Maybe a better way to present our results would be to show R differences between each scenario and the present one. Even though the absolute value of the differences will depend on the electron density, the sign (positive for an increase or negative for a decrease) will be the same in all cases.

Regarding the magnetic field effect on electron density, it affects mainly the F2 region. The lower layers of the ionosphere that is the E and F1 regions are mainly under a photo-chemical regime, so changes in the solar radiation and solar zenith angle are expected to be the dominant variation sources. In the case of the F2 layer, plasma diffusion becomes important and the magnetic field plays its role by reducing the effectiveness of diffusion due to ions and electrons

which are forced to diffuse along B at these heights. Changes in the magnetic field inclination and declination then can move up and down the F2 peak height affecting the ionization density. Energetic particle precipitation, which is also a source of ionization, would present stronger changes with the magnetic field variations. However, it is a source of transient character. Cnossen et al. (2011) estimated for a 25% reduction in the dipole moment of the Earth an increase in temperature, causing the thermosphere to expand and ionospheric layers to move upwards, since they tend to stay on constant-pressure surfaces. They found that the electron density is more affected at equinox with a ~10% variation, while there is little difference at solstice. Even though we consider stronger decreases in the magnetic field we still consider valid our assumption of a constant ionosphere as a first approximation. We are assuming in this case that solar radiation and solar wind will have the same characteristics during reversals as today. This detailed discussion of the impact of the magnetic field on the electron density will also be incorporated to the text.

Reference:

Cnossen, I., Richmond, A. D., Wiltberger, M., Wang, W., and Schmitt, P. (2011), The response of the coupled magnetosphere-ionosphere-thermosphere system to a 25% reduction in the dipole moment of the Earth's magnetic field J. Geophys. Res., 116, A12304, doi:10.1029/2011JA017063.

I recommend the authors to mainly focus on the Spitz angle, and discussed this point more in detail. The Spitz angle only depends on the magnetic field. Thus, the calculated changes of Spitz angle due to magnetic field variations are meaningful, unlike the changes of R which dominantly depend on ionospheric density and its variability. The minor changes of R due to magnetic field variation could be shortly mentioned in discussion for completeness.

We could do this. In fact, we are preparing a paper considering the Spitz angle in full detail, which is a very interesting effect. But in this work we are more interested in showing the ground range dependence on the magnetic field configurations during reversal.

**Specific comments:**

a) The second part of abstract is difficult to understand without reading the article

We are working on this.

b) lines 44-46. Definitions of group and phase path using speed of light  $c$  in vacuum are misleading. According to my knowledge and literature that I read the phase and group path lengths are related to distances traveled by phase and group velocities along the trajectory, respectively (group path length is simply the length of the trajectory). Anyway, I think that these terms are unnecessary for the purpose of this article and could be removed.

They will be removed.

c) paragraph on lines 54-61. I think it could be removed as similar information is better described later, e.g, in the text starting in the end of line 100 and in the following paragraph

It will be removed.

d) line 141, “*right-hand and left-hand polarization in the cases of the o- and x-mode, respectively*” That is incorrect. Ordinary mode is left-handed (L), whereas extraordinary mode is right-handed (R). The terms L-O and R-X modes are often used, instead of simply O and X modes.

We will make this correction.

e) Permittivity of vacuum is missing in equation (2)

You are right. We will correct this equation.

e) lines, 157-158, remove

These two lines explain why we use Hamilton’s equations instead of simply using Snell’s law. Why do you suggest removing them?

f) Equation (8), specify that  $\theta$  changes along the ray path in the ionosphere. Using the initial values, it is only valid at the bottom or below the ionosphere.

You are right. And this is stated clearly in the Figure captions. The angle that presents almost no changes during the whole path is the angle between the plane containing the ray path, and the plane of the field lines, or magnetic meridian. And this last angle is included in the initial  $\theta$ .

g) Text related to equation (9), lines 171-179. It should be mentioned that Spitze trajectories for incidence angles between zero and critical angle  $\Phi_c$ ,  $0 < \Phi < \Phi_c$ , are only formed for wave frequencies  $f < f_oF2$ .

You are right. We will add this comment to the revised version.

h) I think there should be  $\sin(\Phi_c)$  on the left hand side of equation (9), see, e.g., Eliasson et al. (2015), J. Plasma Physics, vol. 81, 415810201, doi:10.1017/S0022377814000968 or Mjølhus (1990), Radio Sci. **25**(6), 1321–1339

You are totally right.

i) Is really the same ionospheric profile used over the same globe? If yes, it makes no sense. See also the general comment

A uniform ionosphere is used in order to obtain variations due only to magnetic field changes. It could be thought of a way to filter out the electron density effect. This is explained better in our answer to your main comment.

j) lines 268-269. The refractive index mainly depends on plasma density. Magnetic field  $B$  and angle between  $B$  and  $k$  have relatively minor effect in the ionosphere.

We will add to the revised version that “The refractive index mainly depends on plasma density”

k) line 280, least low in equatorial belt-> largest in equatorial belt  
(the same in abstract)

We will do this correction in the revised version.

l) lines 325-342, this is useless here and partly out of context; without discussing the dominant effect of electron densities it makes no sense.

We wanted to highlight that the Earth magnetic field effects, despite being small, can induce errors that may be significant for certain applications.

m) lines 370-375. This text is suitable for Introduction rather than for conclusion.

We agree. We will move this paragraph to the Introduction.

Hoping to meet all your requirements,

Mariano Fagre, Bruno S. Zossi, Erdal Yigit, Hagay Amit and Ana G. Elias
